# Supplementary material for: Steering the Volume of Tissue Activated With a Directional Deep Brain Stimulation Lead in the Globus Pallidus Pars Interna: A Modeling Study With Heterogeneous Tissue Properties
Source: Frontiers journal article supplement (doi:10.3389/fncom.2020.561180), 2020-09-25
Supplement: Data_Sheet_1.PDF [file Data_Sheet_1.PDF]

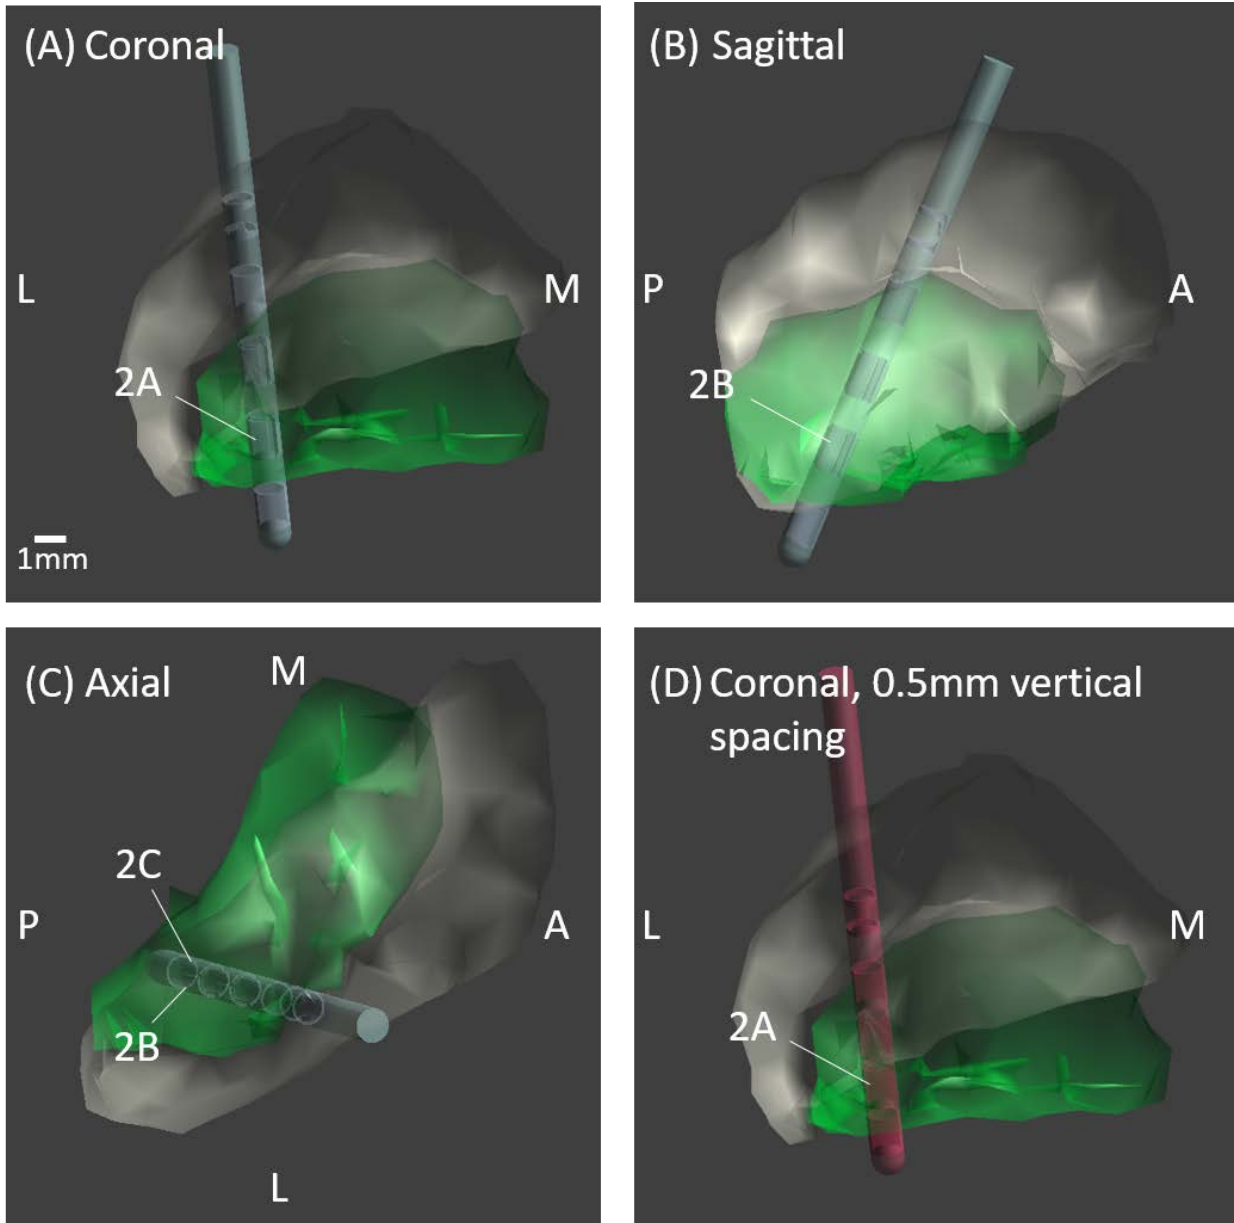

Supplementary Figure 1. (A) Coronal, (B) Sagittal and (C) Axial views of the electrode location within the globus pallidus, showing a segmented lead with 1.5mm vertical spacing. (D) Coronal view showing a segmented lead with 0.5mm vertical spacing.
